# Supplementary material for: Amniocytes can serve a dual function as a source of iPS cells and feeder layers
Source: PubMed Central journal article supplement — Hum Mol Genet. 2010 Dec 14;20(5):962–74. doi: 10.1093/hmg/ddq542 (PMC3033187; doi:10.1093/hmg/ddq542), 2010-12-14
Supplement: supp_ddq542_ddq542supp_table.pdf [file supp_ddq542_ddq542supp_table.pdf]

|              | Gene and Primer                              | Amplicon Size (bp) | Sequence                                                             |
|--------------|----------------------------------------------|--------------------|----------------------------------------------------------------------|
| <i>Mouse</i> | <i>Oct4</i> endogenous<br>Forward<br>Reverse | 224 bp             | 5'-TCTTTCCACCAGGCCCCCGGCTC-3'<br>5'-TGCGGGCGGACATGGGGAGATCC-3'       |
|              | <i>Oct4</i> total<br>Forward<br>Reverse      | 485 bp             | 5'-CTGAGGGCCAGGCAGGAGCACGAG-3'<br>5'-CTGTAGGGAGGGCTTCGGGCACTT-3'     |
|              | <i>Sox2</i> endogenous<br>Forward<br>Reverse | 297 bp             | 5'-TAGAGCTAGACTCCGGGCGATGA-3'<br>5'-TTGCCTTAACAAGACCACGAAA-3'        |
|              | <i>Sox2</i> total<br>Forward<br>Reverse      | 193 bp             | 5'-GGTTACCTCTTCCTCCCACTCCAG-3'<br>5'-TCACATGTGCGACAGGGGCAG-3'        |
|              | <i>Nanog</i><br>Forward<br>Reverse           | 364 bp             | 5'-AGGGTCTGCTACTGAGATGCTCTG-3'<br>5'-CAACCACTGGTTTTCTGCCACCG-3'      |
|              | <i>β-actin</i><br>Forward<br>Reverse         | 236 bp             | 5'-TGTTACCAACTGGGACGACA-3'<br>5'-CCATCACAATGCCTGTGGTA-3'             |
| <i>Human</i> | <i>OCT4</i><br>Forward<br>Reverse            | 144 bp             | 5'-GACAGGGGGAGGGGAGGAGCTAGG-3'<br>5'-CTTCCCTCCAACCAGTTGCCCAAAC-3'    |
|              | <i>SOX2</i><br>Forward<br>Reverse            | 151 bp             | 5'-GGGAAATGGGAGGGGTGCAAAGAGG-3'<br>5'-TTGCGTGAGTGTGGATGGGATTGGTG-3'  |
|              | <i>NANOG</i><br>Forward<br>Reverse           | 154 bp             | 5'-TGAACCTCAGCTACAAACAG-3'<br>5'-TGGTGGTAGGAAGAGTAAAG-3'             |
|              | <i>GDF3</i><br>Forward<br>Reverse            | 631 bp             | 5'-CTTATGCTACGTAAAGGAGCTGGG-3'<br>5'-GTGCCAACCAGTCCCAGGAAAGTT-3'     |
|              | <i>DNMT3B</i><br>Forward<br>Reverse          | 242 bp             | 5'-TGCTGCTCACAGGGCCCGATACTTC-3'<br>5'-TCCTTTGAGCTCAGTGCACCACAAAAC-3' |
|              | <i>β-ACTIN</i><br>Forward<br>Reverse         | 174 bp             | 5'-AGCCTCGCCTTTGCCGA-3'<br>5'-CTGGTGCCTGGGGCG-3'                     |

**Table S1 - Primer sequences used for gene expression analysis by RT-PCR and qRT-PCR.**
